# Supplementary material
Source: PubMed Central journal article supplement (PMC8442399)
Supplement: 40359_2021_649_MOESM2_ESM.pdf [file 40359_2021_649_MOESM2_ESM.pdf]

## SUPPLEMENTARY MATERIAL

### Depressive symptoms measured by 10 items derived from the BDI-II

|                                                                     | Total (%)  |
|---------------------------------------------------------------------|------------|
| <b>Sadness</b>                                                      |            |
| 0. I did not feel sad                                               | 42 (20.7)  |
| 1. I felt sad                                                       | 117 (57.6) |
| 2. I was sad all the time, and I couldn't snap out of it            | 32 (15.8)  |
| 3. I was so sad or unhappy that I couldn't stand it                 | 11 (5.4)   |
| Missing                                                             | 1 (0.5)    |
| <b>Pessimism</b>                                                    |            |
| 0. I was not particularly discouraged about the future              | 67 (33)    |
| 1. I felt discouraged about the future                              | 99 (48.8)  |
| 2. I felt I had nothing to look forward to                          | 22 (10.8)  |
| 3. I felt the future was hopeless and that things could not improve | 14 (6.9)   |
| Missing                                                             | 1 (0.5)    |
| <b>Loss of pleasure</b>                                             |            |
| 0. I got as much satisfaction out of things as I used to            | 99 (48.8)  |
| 1. I didn't enjoy things the way I used to                          | 48 (23.6)  |
| 2. I didn't get real satisfaction out of anything anymore           | 42 (20.7)  |
| 3. I was dissatisfied or bored with everything                      | 13 (6.4)   |
| Missing                                                             | 1 (0.5)    |
| <b>Loss of interest</b>                                             |            |
| 0. I didn't lose interest in other people or activities             | 96 (47.3)  |
| 1. I was less interested in other people or things than before      | 63 (31)    |
| 2. I lost most of my interest in other people or things             | 31 (15.3)  |
| 3. It was hard to get interested in anything                        | 11 (5.4)   |
| Missing                                                             | 2 (1)      |
| <b>Loss of energy</b>                                               |            |
| 0. I had as much energy as ever                                     | 62 (30.5)  |
| 1. I had less energy than I used to have                            | 100 (49.3) |
| 2. I didn't have enough energy to do very much                      | 32 (15.8)  |
| 3. I didn't have enough energy to do anything                       | 8 (3.9)    |
| Missing                                                             | 1 (0.5)    |
| <b>Changes in sleeping pattern</b>                                  |            |
| 0. I did not experience any change in my sleeping pattern           | 56 (27.6)  |
| 1.a I slept somewhat more than usual                                | 61 (30)    |
| 1.b I slept somewhat less than usual                                | 41 (20.2)  |
| 2.a I slept a lot more than usual                                   | 16 (8)     |
| 2.b I slept a lot less than usual                                   | 19 (9.4)   |
| 3.a I slept most of the day                                         | 1 (0.5)    |
| 3.b I woke up 1-2 hours early, and I couldn't get back to sleep     | 9 (4.4)    |
| Missing                                                             |            |
| <b>Irritability %</b>                                               |            |
| 0. I was not more irritable than usual                              | 74 (36.5)  |
| 1. I was more irritable than usual                                  | 78 (38.4)  |
| 2. I was much more irritable than usual                             | 36 (17.7)  |
| 3. I was irritable all the time                                     | 13 (6.4)   |
| Missing                                                             | 2 (1)      |

|                                                                       |           |
|-----------------------------------------------------------------------|-----------|
| <b>Changes in appetite %</b>                                          |           |
| 0. I did not experience any change in my appetite                     | 78 (38.4) |
| 1.a My appetite was somewhat less than usual                          | 25 (12.3) |
| 1.b My appetite was somewhat greater than usual                       | 71 (35)   |
| 2.a My appetite was much less than usual                              | 9 (4.4)   |
| 2.b My appetite was much greater than usual                           | 19 (9.4)  |
| 3.a I had no appetite at all                                          | -         |
| 3.b I craved food all the time                                        | -         |
| Missing                                                               | 1 (0.5)   |
| <b>Concentration difficulty %</b>                                     |           |
| 0. I could concentrate as well as ever                                | 60 (29.6) |
| 1. I couldn't concentrate as well as usual                            | 76 (37.4) |
| 2. It was hard to keep my mind on anything for very long              | 55 (27.1) |
| 3. I found I couldn't concentrate on anything                         | 11 (5.4)  |
| Missing                                                               | 1 (0.5)   |
| <b>Tiredness or fatigue %</b>                                         |           |
| 0. I was no more tired or fatigued than usual                         | 87(43)    |
| 1. I got tired or fatigued more easily than usual                     | 85 (42)   |
| 2. I was too tired or fatigued to do a lot of the things I used to do | 28 (13.8) |
| 3. I was too tired or fatigued to do most of the things I used to do  | 3 (1.5)   |
| Missing                                                               |           |
